# Supplementary material for: Enhanced electron transport and optical properties of experimentally synthesized monolayer Si9C15: a comprehensive DFT study for nanoelectronics and photocatalytic applications
Source: Royal Society of Chemistry journal article supplement (doi:10.1039/d4cp01456a), 2024-01-01
Supplement: d4cp01456a1.pdf [file d4cp01456a1.pdf]

## Supporting Information

**Enhanced Electron Transport and Optical Properties of  
Experimentally Synthesized Monolayer Si<sub>9</sub>C<sub>15</sub>: A Comprehensive  
DFT Study for Nanoelectronics and Photocatalytic Applications**

**Yuehua Xu\* and Daqing Li**

**School of Microelectronics and Control Engineering, Changzhou  
University, Changzhou 213164, Jiangsu, China.**

**Corresponding author: [yhxu@cczu.edu.cn](mailto:yhxu@cczu.edu.cn)**

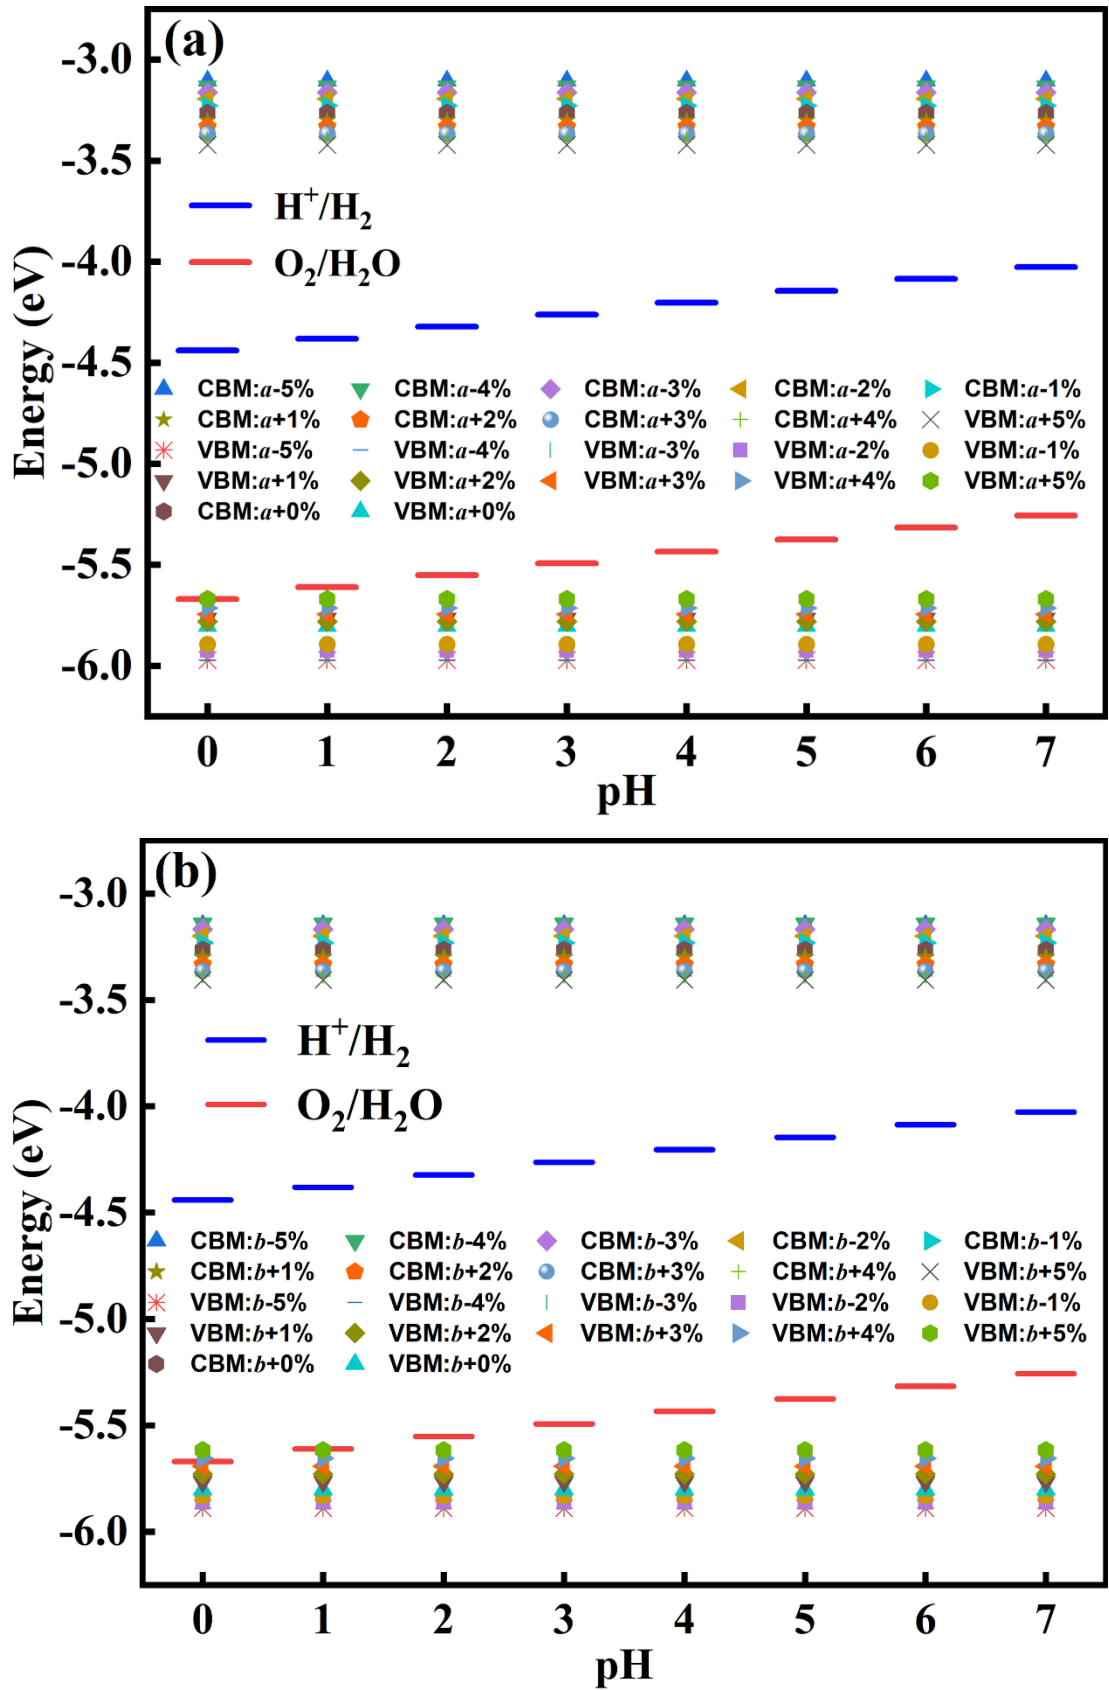

Fig.S1 Evolution of band-edge positions of  $\text{Si}_5\text{C}_{15}$  as a function of applied uniaxial strain in  $-5\%$ – $5\%$  in the direction *a* and *b*, respectively. The redox potentials for water oxidation and hydrogen reduction from  $\text{pH} = 0$  to  $\text{pH} = 7$  are marked as red and blue lines, respectively. The various symbols in the legend represent the positions of CBM and VBM at different strains, respectively.

## OER and HER free energy theory

To calculate the Gibbs free energy  $\Delta G$  in the OER and HER reaction processes, we have utilized the Gibbs free energy theory proposed by Nørskov et al., as follows<sup>[1-4]</sup>:

$$\Delta G = \Delta E + \Delta E_{\text{ZPE}} - T\Delta S + \Delta G_{\text{pH}} + \Delta G_U$$

$\Delta E$  represents the adsorption energy, while  $\Delta E_{\text{ZPE}}$  and  $\Delta S$  correspond to the differences in zero-point energy and entropy between the adsorbed state and the gas phase. All the  $E_{\text{ZPE}}$  and  $S$  results can be obtained from the reference<sup>[5]</sup> and are shown in Table S1.  $\Delta G_{\text{pH}} = 0.059 \times \text{pH}$  is the free energy at different pH values, and  $\Delta G_U = -eU$  represents an extra potential bias provided by an electron or hole relative to the normal hydrogen electrode.

The equation for HER is as follows:

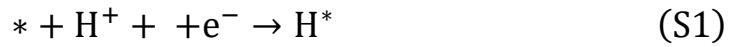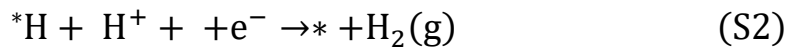

There are four steps involved in the conversion of  $\text{H}_2\text{O}$  into  $\text{O}_2$  molecules in OER reaction:

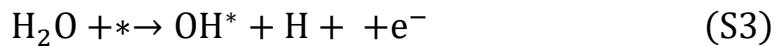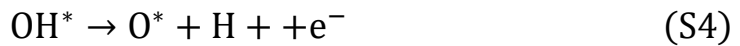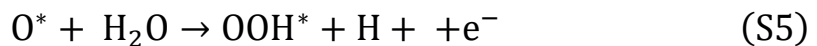

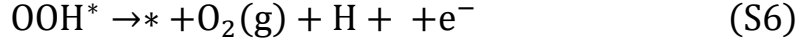

where \* denotes an adsorbed species, and OH\*, O\*, OOH\*, and H\* are the adsorbed intermediates.

The change in free energy of HER as a function of electrolyte pH can be expressed as:

$$\Delta G_1 = G_{\text{H}^*} - \frac{1}{2} G_{\text{H}_2} - G^* + 0.059 \times \text{pH} - eU \quad (\text{S7})$$

$$\Delta G_2 = G^* + \frac{1}{2} G_{\text{H}_2} - G_{\text{H}^*} + 0.059 \times \text{pH} - eU \quad (\text{S8})$$

The potential of the photogenerated electrons for HER ( $U_e$ ) is defined as the energy difference between the hydrogen reduction potential and the CBM of hydrogen evolution photocatalyst, thus  $U_e = eU - 0.059 \times \text{pH}$ .

For OER:

$$\Delta G_3 = G_{\text{OH}^*} + \frac{1}{2} G_{\text{H}_2} - G_{\text{H}_2\text{O}} - G^* - 0.059 \times \text{pH} - eU \quad (\text{S9})$$

$$\Delta G_4 = G_{\text{O}^*} + \frac{1}{2} G_{\text{H}_2} - G_{\text{OH}^*} - 0.059 \times \text{pH} - eU \quad (\text{S10})$$

$$\Delta G_5 = G_{\text{OOH}^*} + \frac{1}{2} G_{\text{H}_2} - G_{\text{H}_2\text{O}} - G_{\text{O}^*} - 0.059 \times \text{pH} - eU \quad (\text{S11})$$

$$\Delta G_6 = 2G_{\text{H}_2\text{O}} + G^* - \frac{3}{2} G_{\text{H}_2} - G_{\text{OOH}^*} + 4.92 - 0.059 \times \text{pH} - eU \quad (\text{S12})$$

The potential of the photogenerated holes for OER ( $U_h$ ) is defined as the energy difference between the VBM of oxygen evolution photocatalyst and the hydrogen reduction potential, thus  $U_h = eU + 0.059 \times \text{pH}$ . The term  $0.059 \times \text{pH}$  denotes the energetic contribution resulting from changes in the

concentration of  $H^+$  ions, while  $eU$  accounts for the impact of potential bias on all states. This involves the transfer of energy through the movement of an electron or a hole within the electrode, with  $U$  representing the electrode potential relative to the normal hydrogen electrode (NHE).

**Table S1** The entropy and zero-point energy corrections are utilized to determine the free energy of reactants, products, and intermediate species that are adsorbed on catalysts<sup>[5]</sup>. In the case of adsorbates, the ZPE values are averaged across all single atom catalyst systems as they exhibit a rather similar value.

| Species   | $T \times S$ (eV) (298K) | ZPE (eV) |
|-----------|--------------------------|----------|
| $H^*$     | 0                        | 0.17     |
| $O^*$     | 0                        | 0.07     |
| $OH^*$    | 0                        | 0.33     |
| $OOH^*$   | 0                        | 0.43     |
| $H_2(g)$  | 0.41                     | 0.27     |
| $H_2O(g)$ | 0.58                     | 0.57     |

1. Nørskov, J.K., et al., *Origin of the overpotential for oxygen reduction at a fuel-cell cathode*. The Journal of Physical Chemistry B, 2004. **108**(46): p. 17886-17892.
2. Greeley, J., et al., *Computational high-throughput screening of electrocatalytic materials for hydrogen evolution*. Nature materials, 2006. **5**(11): p. 909-913.
3. Rossmeisl, J., et al., *Electrolysis of water on oxide surfaces*. Journal of Electroanalytical Chemistry, 2007. **607**(1-2): p. 83-89.
4. Valdés, Á., et al., *Oxidation and photo-oxidation of water on TiO<sub>2</sub> surface*. The

Journal of Physical Chemistry C, 2008. **112**(26): p. 9872-9879.

5. Xu, H., et al., *A universal principle for a rational design of single-atom electrocatalysts*. Nature Catalysis, 2018. **1**(5): p. 339-348.
